# Supplementary figures and images for: Simulation study on the validity of the average risk approach in estimating population attributable fractions for continuous exposures
Source: HighWire-hosted journal article supplement (doi:10.1136/bmjopen-2020-045410), 2021-07-01

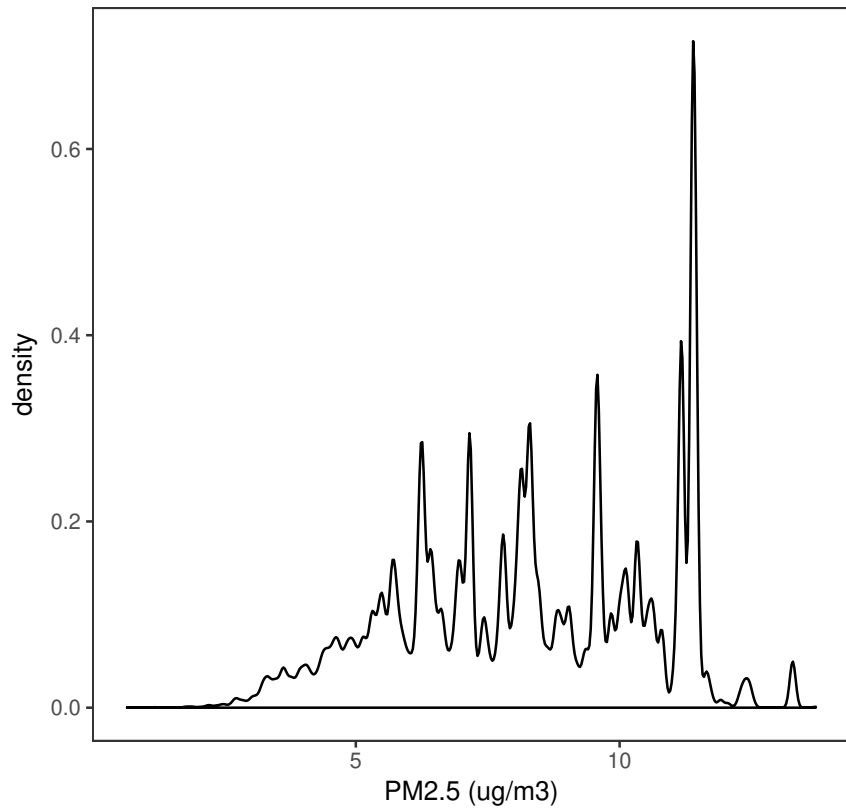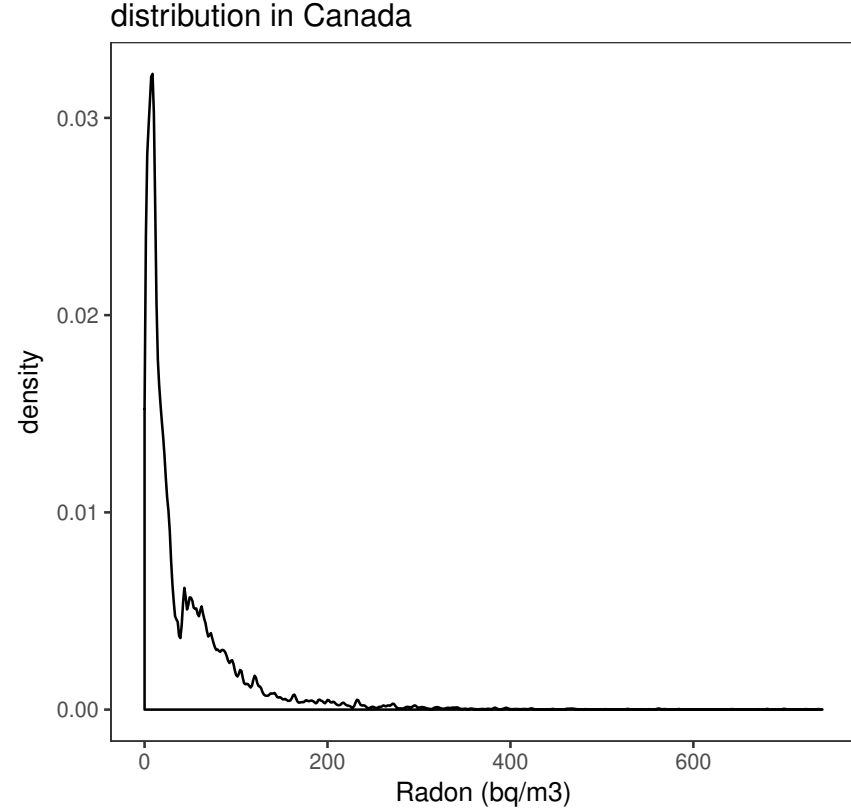

Supplement: bmjopen-2020-045410supp002_data_supplement.pdf [file bmjopen-2020-045410supp002_data_supplement.pdf]
